# Supplementary material for: Optimization of Approaches to Analysis of Lignin by Thermal Decomposition
Source: MDPI journal article supplement (doi:10.3390/polym15132861), 2023-06-28
Supplement: s1 [file s1]

## Supplementary information

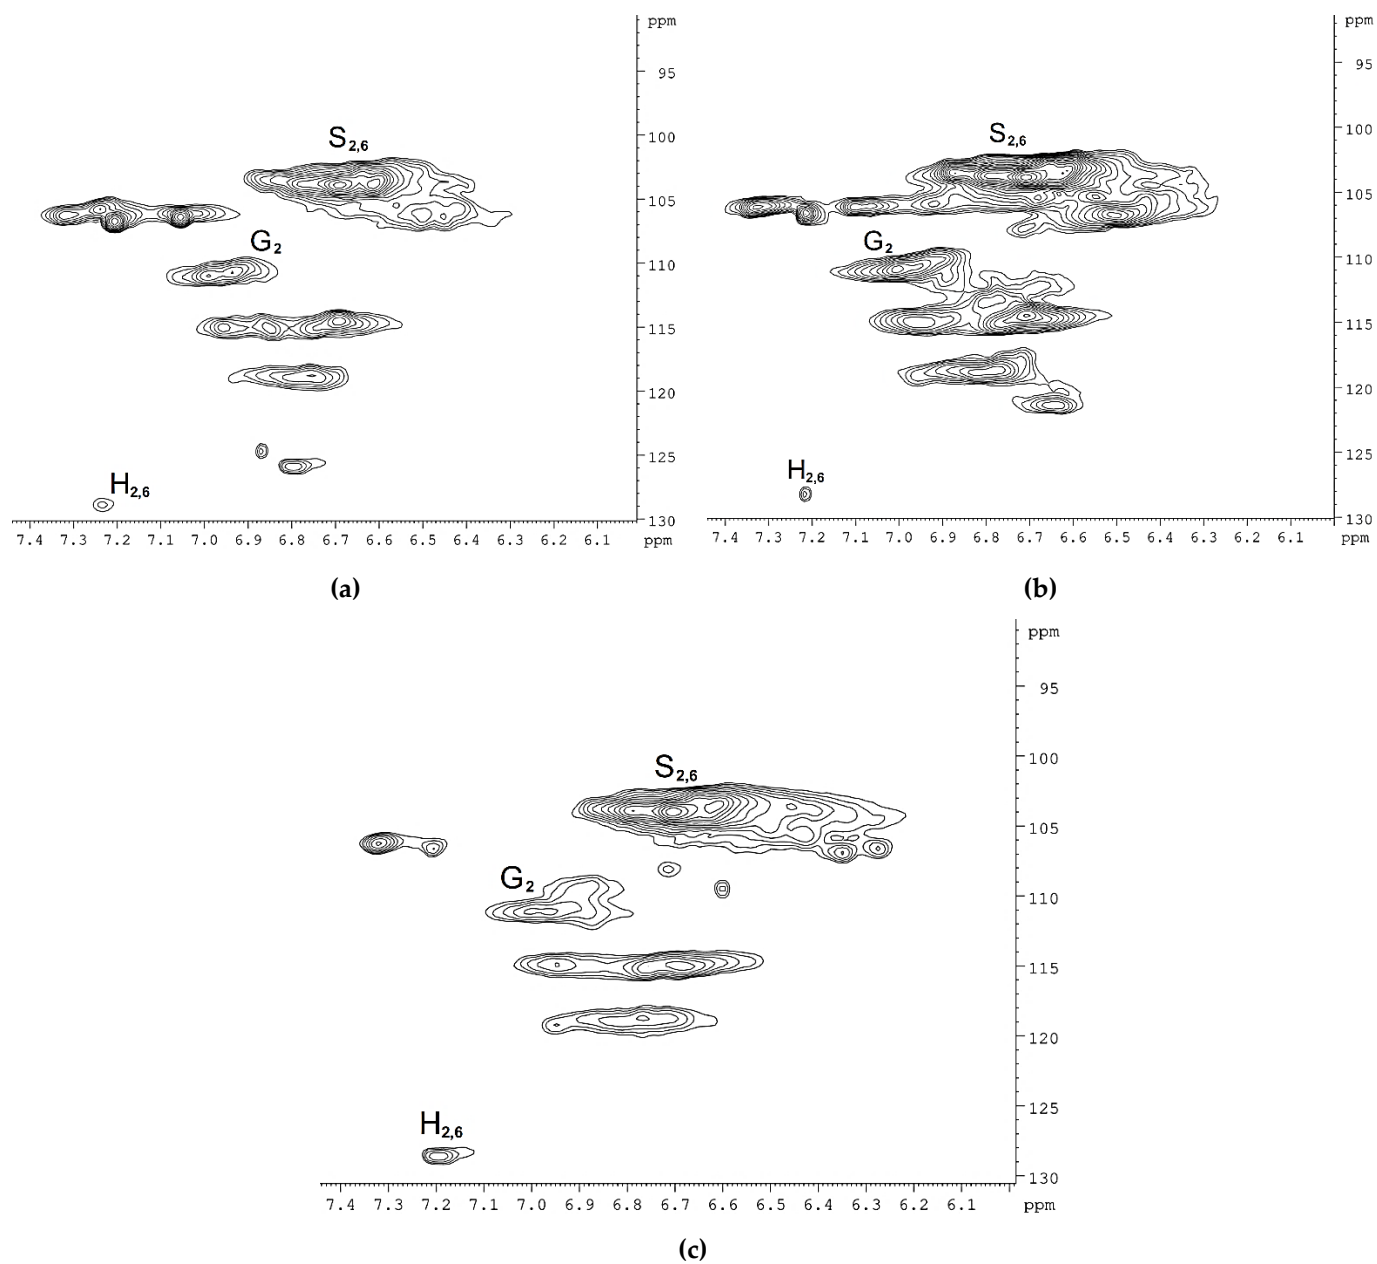

**Figure S1.** The aromatic/unsaturated regions of the HSQC NMR spectra of: (a) MWL; (b) DL and (c) EtOH

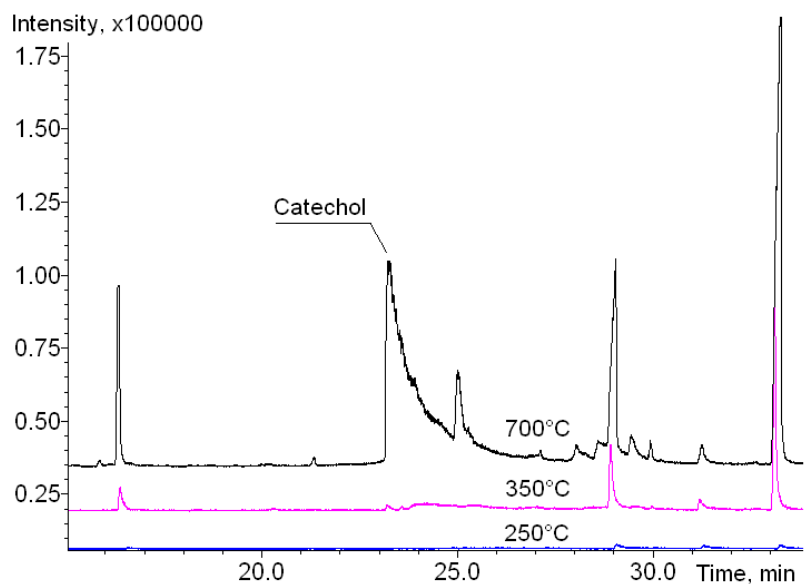

(a)

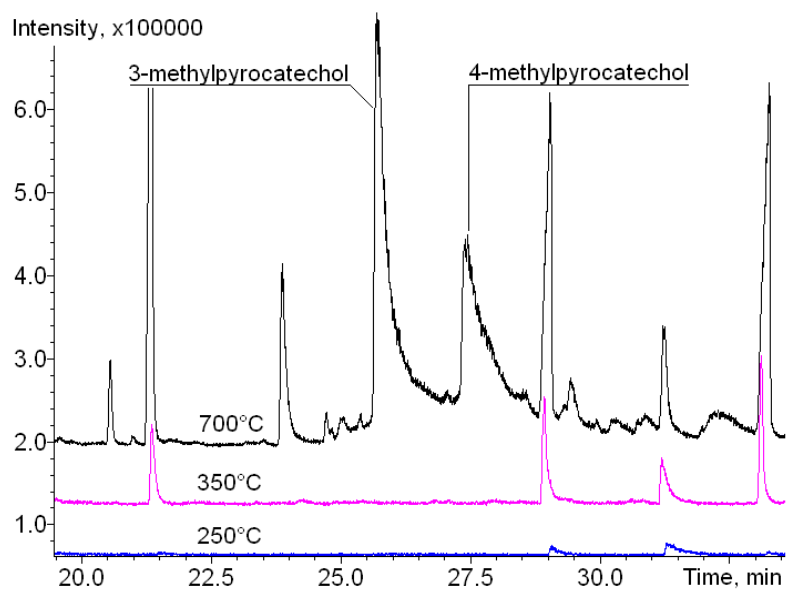

(b)

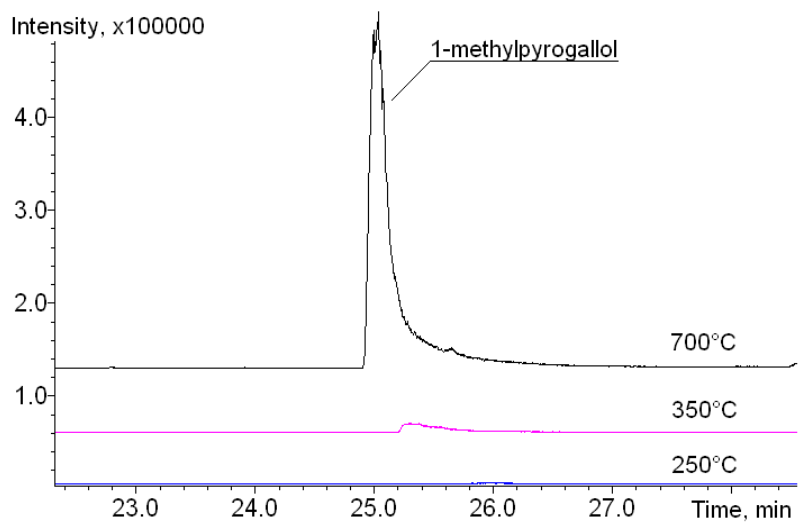

(c)

**Figure S2.** Pyrograms of the by-products, resulting from secondary reactions, at 250, 350 and 700 °C:  
(a) catechol; (b) methylcatechol; (c) pyrogallol

**Table S1.** Products of thermal decomposition of lignin

| Name                                                                | Rt,<br>min    | Ri          | Target<br>Ion | Ref.<br>ion | Group    |
|---------------------------------------------------------------------|---------------|-------------|---------------|-------------|----------|
| <b>*Phenol</b>                                                      | <b>11,942</b> | <b>971</b>  | <b>94</b>     | <b>66</b>   | <b>H</b> |
| Phenol, 2-methyl-                                                   | 14,981        | 1045        | 108           | 107         | H        |
| <b>*Phenol, 4-methyl-</b>                                           | <b>15,894</b> | <b>1067</b> | <b>107</b>    | <b>108</b>  | <b>H</b> |
| <b>*Phenol, 2-methoxy- (Guaiacol)</b>                               | <b>15,952</b> | <b>1080</b> | <b>109</b>    | <b>124</b>  | <b>G</b> |
| Phenol, 2,6-dimethyl-                                               | 16,701        | 1098        | 107           | 122         | H        |
| Phenol, 2-methoxy-3-methyl                                          | 18,003        | 1130        | 123           | 138         | G        |
| Phenol, 2,5-dimethyl-                                               | 18,559        | 1135        | 107           | 122         | H        |
| Phenol, 2,4-dimethyl- + Phenol, 2,3-dimethyl-                       | 18,895        | 1146        | 107           | 122         | H        |
| Phenol, 2-methoxy-5-methyl                                          | 19,773        | 1179        | 123           | 138         | G        |
| Phenol, 3-ethyl-                                                    | 19,835        | 1183        | 107           | 122         | H        |
| Phenol, 4-methoxy-3-methyl                                          | 20,173        | 1187        | 123           | 138         | G        |
| Phenol, 4-ethyl-                                                    | 20,213        | 1192        | 107           | 122         | H        |
| <b>*Phenol, 2-methoxy-4-methyl (Creosol)</b>                        | <b>20,587</b> | <b>1196</b> | <b>123</b>    | <b>138</b>  | <b>G</b> |
| Catechol                                                            | 21,965        | 1206        | 110           | 64          | PolyOH   |
| Phenol, 3-methoxy-                                                  | 22,445        | 1235        | 124           | 94          | G        |
| Phenol, 4-ethyl-3-methyl-                                           | 22,748        | 1247        | 121           | 136         | H        |
| Phenol, 3,6-dimethoxy-                                              | 22,827        | 1260        | 154           | 139         | S        |
| Pyrogallol 1-methyl ether                                           | 23,862        | 1271        | 140           | 97          | PolyOH   |
| Phenol, 2,4,6-trimethyl-                                            | 23,903        | 1285        | 121           | 136         | H        |
| Phenol, 4-ethyl-2-methoxy- (Ethylguaiacol)                          | 24,215        | 1294        | 137           | 152         | G        |
| Pyrocatechol, 3-methyl-                                             | 24,324        | 1299        | 124           | 123         | PolyOH   |
| Phenol, 4-ethyl-2-methoxy-                                          | 24,979        | 1317        | 137           | 152         | G        |
| 2-Methoxy-4-vinylphenol                                             | 25,884        | 1322        | 150           | 135         | G        |
| Resorcinol                                                          | 25,888        | 1322        | 110           | 82          | PolyOH   |
| Pyrocatechol, 4-methyl-                                             | 25,947        | 1325        | 124           | 123         | PolyOH   |
| Phenol, 3-methoxy-5-methyl                                          | 27,015        | 1341        | 138           | 107         | G        |
| Phenol, 3,4-dimethoxy-                                              | 27,196        | 1345        | 139           | 154         | S        |
| 4-Propenylphenol                                                    | 27,782        | 1363        | 134           | 133         | H        |
| Phenol, 3,4-dimethoxy-                                              | 27,826        | 1365        | 139           | 154         | S        |
| Acetophenone, 2-hydroxy-5-methoxy-                                  | 28,298        | 1383        | 151           | 166         | G        |
| Phenol, 2-methoxy-4-(2-propenyl)-                                   | 28,434        | 1385        | 164           | 149         | G        |
| Acetophenone, 4-hydroxy-3-methoxy- (Acetovanillone )                | 28,569        | 1387        | 151           | 166         | G        |
| <b>*Phenol, 2,6-dimethoxy- (Syringol)</b>                           | <b>28,611</b> | <b>1389</b> | <b>154</b>    | <b>139</b>  | <b>S</b> |
| Phenol, 3,4-dimethoxy-                                              | 28,884        | 1390        | 154           | 139         | S        |
| Phenol, 2-methoxy-4-propyl- (Propylguaiacol)                        | 28,894        | 1392        | 137           | 166         | G        |
| Benzaldehyde, 4-hydroxy-                                            | 29,287        | 1398        | 121           | 122         | H        |
| Phenol, 4-propyl-                                                   | 29,415        | 1399        | 107           | 77          | H        |
| 4-Ethylcatechol                                                     | 29,707        | 1410        | 123           | 138         | PolyOH   |
| Phenol, 2-methoxy-5-(1-propenyl)-                                   | 30,173        | 1425        | 164           | 149         | G        |
| Phenol, 2-methoxy-3-(1-propenyl)- (Isoeugenol)                      | 30,487        | 1434        | 164           | 149         | G        |
| Phenol, 2-methoxy-4-(1-propenyl)- (Isoeugenol)                      | 30,777        | 1440        | 164           | 149         | G        |
| Benzaldehyde, 4-hydroxy-3-methoxy- (Vanillin)                       | 30,868        | 1440        | 151           | 152         | G        |
| Phenol, 5-methoxy-2,3-dimethyl-                                     | 31,574        | 1442        | 152           | 137         | G        |
| Phenol, 2-methoxy-4-propenyl- (cis-Isoeugenol)                      | 32,711        | 1487        | 164           | 149         | G        |
| <b>*Phenol, 4-methyl, 2,6-dimethoxy- (4-methylsyringol)</b>         | <b>32,974</b> | <b>1488</b> | <b>168</b>    | <b>153</b>  | <b>S</b> |
| Benzaldehyde, 2-hydroxy-6-methyl-                                   | 33,007        | 1490        | 136           | 90          | G        |
| Phenol, 2-methoxy-4-propyl-                                         | 33,468        | 1497        | 137           | 166         | G        |
| Phenol, 2-methoxy-4-acetyl                                          | 34,583        | 1526        | 151           | 166         | G        |
| Acetylguaiacol isomer                                               | 34,809        | 1532        | 166           | 151         | G        |
| Benzoic acid, 4-hydroxy-3-methoxy-, methyl ester (Methyl vanillate) | 35,809        | 1532        | 151           | 182         | G        |

|                                                                                       |        |      |     |     |        |
|---------------------------------------------------------------------------------------|--------|------|-----|-----|--------|
| 4-ethyl-2,6-dimethoxy-phenol (4-ethyl-syringol)                                       | 36,174 | 1572 | 167 | 182 | S      |
| 4-(2-Hydroxyethyl)-2-methoxyphenol                                                    | 36,431 | 1577 | 137 | 180 | G      |
| Ethanone, 1-(4-hydroxy-3-methoxyphenyl)-                                              | 37,184 | 1594 | 151 | 166 | G      |
| Phenol, 4-ethenyl, 2,6-dimethoxy (4-vinylsyringol)                                    | 37,825 | 1615 | 180 | 165 | S      |
| 4-((1E)-3-Hydroxy-1-propenyl)-2-methoxyphenol                                         | 38,152 | 1624 | 137 | 124 | G      |
| Benzeneacetic acid, 4-hydroxy-3-methoxy-, methyl ester                                | 38,421 | 1632 | 137 | 196 | G      |
| 4-Hydroxy-2-methoxycinnamaldehyde                                                     | 38,486 | 1634 | 178 | 135 | G      |
| propano 3-methoxy-4-hydroxyphenone                                                    | 38,518 | 1634 | 151 | 123 | G      |
| Ethanone, 1-(4-hydroxy-3-methoxyphenyl)- (Apocynin)                                   | 38,815 | 1638 | 151 | 123 | G      |
| Phenol, 4-(2-propenyl), 2,6-dimethoxy- (4-allylsyringol)                              | 39,316 | 1656 | 194 | 91  | S      |
| Phenol, 4-propyl, 2,6-dimethoxy- (4-propylsyringol)                                   | 39,566 | 1663 | 167 | 196 | S      |
| 4-n-Propylresorcinol                                                                  | 39,828 | 1665 | 123 | 152 | PolyOH |
| Phenol, 4-(3-hydroxy-1-propenyl)-                                                     | 40,793 | 1683 | 107 | 150 | G      |
| (4-Hydroxy-3-methoxyphenyl)acetic acid (Homovanillic acid)                            | 41,398 | 1702 | 137 | 182 | G      |
| Phenol, 4-(2-propenyl), 2,6-dimethoxy-, cis-                                          | 41,523 | 1708 | 194 | 91  | S      |
| Benzaldehyde, 4-hydroxy-3,5-dimethoxy- (Syringaldehyde)                               | 41,837 | 1717 | 182 | 93  | S      |
| 4-((1E)-3-Hydroxy-1-propenyl)-2-methoxyphenol                                         | 42,108 | 1728 | 137 | 180 | G      |
| 1-Propanone, 3-hydroxy-1-(4-hydroxy-3-methoxyphenyl)-                                 | 42,727 | 1744 | 151 | 108 | G      |
| 3-Methoxy-4-hydroxybenzalacetone                                                      | 42,816 | 1748 | 149 | 192 | G      |
| Phenol, 2,6-dimethoxy-4-(2-propenyl)- (4-propenylsyringol- trans)                     | 43,237 | 1762 | 194 | 91  | S      |
| 1-(4-Hydroxy-3,5-dimethoxyphenyl)-ethanal<br>(Homosyringaldehyde)                     | 43,467 | 1765 | 167 | 196 | S      |
| Acetic acid, (4-hydroxy-3-methoxyphenyl)-, methyl ester (Methyl<br>homovanillate)     | 44,258 | 1785 | 137 | 196 | G      |
| 2-Propenal, 3-(4-hydroxy-3-methoxyphenyl)- (Coniferyl aldehyde)                       | 44,502 | 1793 | 178 | 147 | G      |
| Acetophenone, 4-hydroxy-3,5-dimethoxy- (Acetosyringone)                               | 44,533 | 1796 | 181 | 196 | S      |
| 2-Propen-1-ol, 3-(4-hydroxy-3-methoxyphenyl)- (Coniferyl alcohol )                    | 44,853 | 1802 | 137 | 180 | G      |
| 2-Butanone, 4-(4-hydroxy-3-methoxyphenyl)- (Vanillylacetone;<br>Gingerone)            | 45,502 | 1825 | 137 | 194 | G      |
| Benzoic acid, 4-hydroxy-3,5-dimethoxy-, methyl ester (Syringic<br>acid, methyl ester) | 45,793 | 1836 | 181 | 212 | S      |
| 1-(4-Hydroxy-3,5-dimethoxyphenyl)-2-propanone (Syringyl<br>acetone)                   | 45,988 | 1837 | 167 | 210 | S      |
| 3-(4-Hydroxy-3,5-dimethoxyphenyl)-1-propanal                                          | 47,631 | 1885 | 167 | 182 | S      |
| 1-Propanone, 1-(4-hydroxy-3,5-dimethoxyphenyl)<br>(Propiosyringone)                   | 47,757 | 1892 | 181 | 153 | S      |
| 1-Propen-2-al, 3-(4-hydroxy-3,5-dimethoxyphenyl)<br>(Propenylsyringone)               | 48,063 | 1896 | 208 | 177 | S      |
| 1-(4-Hydroxy-3,5-dimethoxyphenyl)-1-propanol (Dihydrosinapyl<br>alcohol)              | 50,283 | 1959 | 168 | 212 | S      |
| 2-Propen-1-ol, 3-(4-hydroxy-3,5-dimethoxyphenyl) (Sinapyl alcohol,<br>cis)            | 50,961 | 1982 | 167 | 210 | S      |
| Sinapic aldehyde                                                                      | 53,266 | 2052 | 208 | 177 | S      |
| 2-Propen-1-ol, 3-(4-hydroxy-3,5-dimethoxyphenyl) (Sinapyl alcohol,<br>trans)          | 53,499 | 2064 | 210 | 182 | S      |

\* main products in each group

**Table S2.** Effect of temperature on the thermal decomposition

| Units, % | Temperature, °C |            |            |            |                   |            | HSQC NMR          |
|----------|-----------------|------------|------------|------------|-------------------|------------|-------------------|
|          | 400             | 350        | 300        | 250        | 200               | 150        |                   |
| H        | 0.4 ± 0.1       | 0.2 ± 0.1  | 0.3 ± 0.1  | 0.3 ± 0.1  | <b>0.8 ± 0.3</b>  | 1.1 ± 0.4  | <b>1.3 ± 0.1</b>  |
| G        | 25.0 ± 3.0      | 25.6 ± 3.0 | 25.4 ± 3.0 | 26.6 ± 3.2 | <b>30.1 ± 3.6</b> | 31.0 ± 3.7 | <b>29.5 ± 0.9</b> |
| S        | 74.6 ± 3.8      | 74.2 ± 3.8 | 74.3 ± 3.8 | 73.1 ± 3.8 | <b>68.5 ± 3.5</b> | 67.9 ± 3.5 | <b>69.8 ± 1.8</b> |
| Poly-OH  | 0.7             | 0.5        | 0.4        | 0.3        | <b>0.3</b>        | 0.0        | -                 |

**Table S3.** Effect of thermal desorption duration

| Units, % | Process duration, min |            |                   |                   |            | HSQC NMR          |
|----------|-----------------------|------------|-------------------|-------------------|------------|-------------------|
|          | 5                     | 10         | 20                | 30                | 60         |                   |
| H        | 0.5 ± 0.2             | 0.6 ± 0.2  | <b>0.4 ± 0.1</b>  | <b>0.4 ± 0.1</b>  | 0.4 ± 0.1  | <b>1.3 ± 0.1</b>  |
| G        | 31.9 ± 3.8            | 32.7 ± 3.9 | <b>31.1 ± 3.7</b> | <b>28.6 ± 3.4</b> | 29.1 ± 3.4 | <b>29.5 ± 0.9</b> |
| S        | 67.6 ± 3.5            | 66.7 ± 3.4 | <b>68.6 ± 3.5</b> | <b>71.0 ± 3.6</b> | 70.5 ± 3.6 | <b>69.8 ± 1.8</b> |
| Poly-OH  | 0.11                  | 0.08       | <b>0.26</b>       | <b>0.33</b>       | 0.25       | -                 |

**Table S4.** Effect of heating rate in the DS-mode

| Units, % | Heating rate, °C/min |          |          |          |                 |                 |          |          | HSQC NMR          |
|----------|----------------------|----------|----------|----------|-----------------|-----------------|----------|----------|-------------------|
|          | 20                   | 40       | 60       | 80       | 100             | 120             | 250      | 800      |                   |
| H        | 0.8±0.1              | 0.8±0.1  | 0.9±0.1  | 0.7±0.1  | <b>0.8±0.1</b>  | <b>0.9±0.1</b>  | 0.9±0.1  | 1.0±0.2  | <b>1.3 ± 0.1</b>  |
| G        | 26.1±1.2             | 26.5±1.3 | 28.6±1.4 | 28.4±1.4 | <b>28.7±1.4</b> | <b>30.1±1.4</b> | 30.2±1.4 | 31.6±1.5 | <b>29.5 ± 0.9</b> |
| S        | 73.1±1.2             | 72.7±1.2 | 70.5±1.2 | 70.9±1.2 | <b>70.5±1.2</b> | <b>69.3±1.2</b> | 68.8±1.2 | 67.3±1.1 | <b>69.8 ± 1.8</b> |

**Table S5.** Effect of sample weight in the DS-mode

| Units, % | Sample weight, mg |            |            | HSQC NMR   |
|----------|-------------------|------------|------------|------------|
|          | 0.2               | 0.4        | 0.9        |            |
| H        | 0.8 ± 0.1         | 0.8 ± 0.1  | 0.8 ± 0.1  | 1.3 ± 0.1  |
| G        | 29.1 ± 1.4        | 28.7 ± 1.4 | 27.0 ± 1.3 | 29.5 ± 0.9 |
| S        | 70.0 ± 1.2        | 70.5 ± 1.2 | 72.2 ± 1.2 | 69.8 ± 1.8 |

**Table S6.** Peak shape parameters

| Parameter *                                         | Sample weight, mg |       |        |
|-----------------------------------------------------|-------------------|-------|--------|
|                                                     | 0.2               | 0.4   | 0.9    |
| Phenol, 4-methyl, 2,6-dimethoxy- (4-methylsyringol) |                   |       |        |
| A/H                                                 | 6.849             | 8.549 | 13.316 |
| FWHM                                                | 0.101             | 0.133 | 0.218  |
| AsF                                                 | 0.614             | 0.395 | 0.226  |
| TF                                                  | 0.862             | 0.709 | 0.620  |
| Phenol, 2,6-dimethoxy- (Syringol)                   |                   |       |        |
| A/H                                                 | 8.549             | 8.224 | 12.360 |
| FWHM                                                | 0.107             | 0.126 | 0.204  |
| AsF                                                 | 1.706             | 0.574 | 0.264  |
| TF                                                  | 1.629             | 0.885 | 0.639  |

\* A/H - ratio of the peak area to the peak height; FWHM - full width at half maximum; AsF - peak asymmetry factor; TF - peak tailing factor

**Table S7.** Effect of temperature in the DS-mode

| Units, % | Temperature, °C |          |                 |                 |          |          |          | HSQC<br>NMR       |
|----------|-----------------|----------|-----------------|-----------------|----------|----------|----------|-------------------|
|          | 700             | 550      | 450             | 400             | 350      | 300      | 250      |                   |
| H        | 4.9±0.7         | 4.8±0.7  | <b>2.0±0.3</b>  | <b>0.8±0.1</b>  | 0.5±0.1  | 0.3±0.1  | 0.2±0.1  | <b>1.3 ± 0.1</b>  |
| G        | 30.7±1.5        | 30.6±1.5 | <b>29.3±1.4</b> | <b>28.7±1.4</b> | 27.2±1.3 | 27.2±1.3 | 23.3±1.1 | <b>29.5 ± 0.9</b> |
| S        | 64.3±1.1        | 64.6±1.1 | <b>68.8±1.2</b> | <b>70.5±1.2</b> | 72.3±1.2 | 72.5±1.2 | 76.5±1.3 | <b>69.8 ± 1.8</b> |
| Poly-OH  | 8.1             | 7.8      | <b>5.4</b>      | <b>2.3</b>      | 0.6      | 0.0      | 0.0      | -                 |

**Table S8.** Effect of temperature in the SS-mode.

| Units, % | Temperature, °C |          |          |                 |                 |          |          | HSQC<br>NMR       |
|----------|-----------------|----------|----------|-----------------|-----------------|----------|----------|-------------------|
|          | 700             | 550      | 450      | 400             | 350             | 300      | 250      |                   |
| H        | 74.7±19.4       | 4.2±1.1  | 2.2±0.6  | <b>1.0±0.3</b>  | <b>0.4±0.1</b>  | 0.2±0.1  | 0.3±0.1  | <b>1.3 ± 0.1</b>  |
| G        | 21.6±1.8        | 34.0±2.9 | 32.8±2.8 | <b>31.6±2.7</b> | <b>29.4±2.5</b> | 30.7±2.6 | 27.1±2.3 | <b>29.5 ± 0.9</b> |
| S        | 3.7±0.1         | 61.8±2.2 | 65.0±2.3 | <b>67.3±2.4</b> | <b>70.2±2.5</b> | 69.0±2.5 | 72.6±2.6 | <b>69.8 ± 1.8</b> |
| Poly-OH  | 48.3            | 6.1      | 4.4      | <b>4.6</b>      | <b>1.2</b>      | 0.0      | 0.0      | -                 |
